# Supplementary figures and images for: The Effects of Topiroxostat, a Selective Xanthine Oxidoreductase Inhibitor, on Arterial Stiffness in Hyperuricemic Patients with Liver Dysfunction: A Sub-Analysis of the BEYOND-UA Study
Source: MDPI journal article supplement (doi:10.3390/biomedicines11030674), 2023-02-23

**Figure S1.** Flowchart describing the sub-analysis.

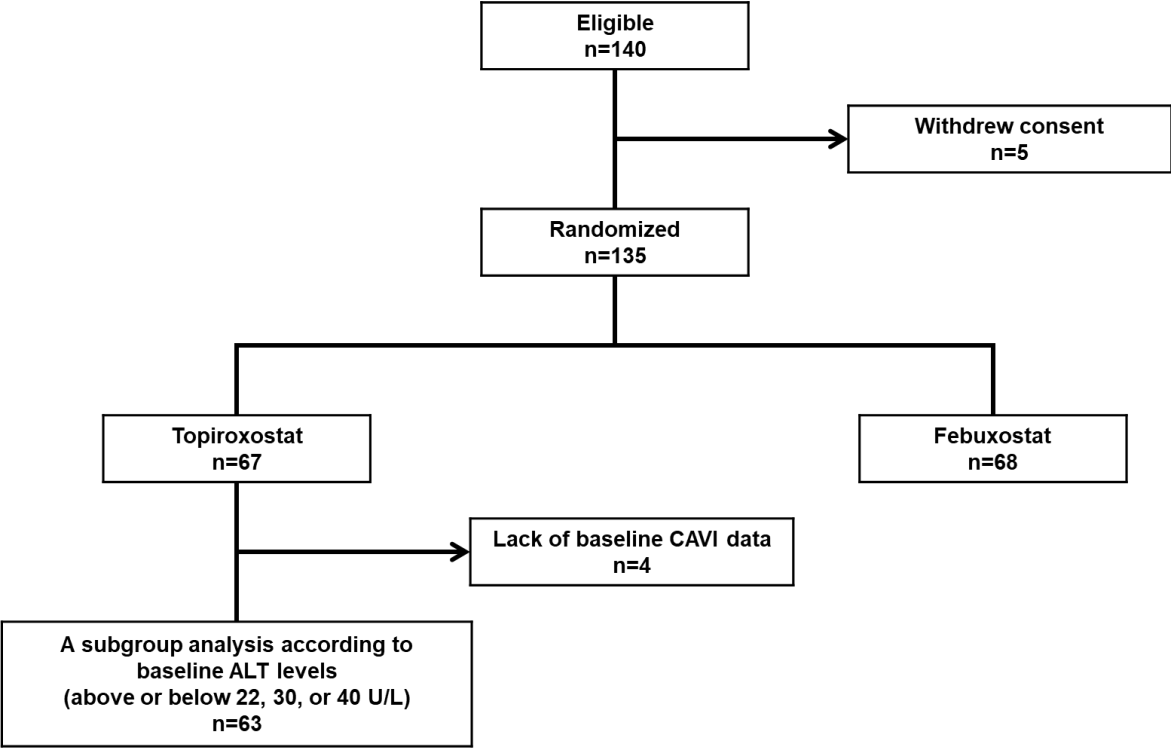

Supplement: s1 [file s1]
